# Supplementary material
Source: publisher figshare collection journal article supplement (https://acs.figshare.com/ndownloader/files/15028307)
Supplement: Supplementary file 1 [file 15028307]

# Supporting Information

## Preparation of Nanocellulose with High-Pressure Homogenization from Pretreated Biomass with Cooking with Active Oxygen and Solid Alkali

Huiqiang Wang,<sup>†</sup> Miao Zuo,<sup>†</sup> Ning Ding,<sup>†</sup> Guihua Yan,<sup>†</sup> Xianhai Zeng,<sup>\*,†,‡</sup> Xing

Tang,<sup>†,‡</sup> Yong Sun,<sup>†,‡</sup> Tingzhou Lei,<sup>§</sup> Lu Lin<sup>\*,†,‡</sup>

<sup>†</sup>College of Energy, Xiamen University, Xiamen 361102, China

<sup>‡</sup>Fujian Engineering and Research Center of Clean and High-valued Technologies for Biomass; Xiamen Key Laboratory of High-Valued Utilization of Biomass, Xiamen University, Xiamen 361102, China

<sup>§</sup>Henan Key Lab of Biomass Energy, Huayuan Road 29, Zhengzhou, Henan 450008, China

## Table of Contents

| Sections             | Page         |
|----------------------|--------------|
| <b>Experimental:</b> | <b>S1</b>    |
| <b>Figures:</b>      | <b>S2</b>    |
| <b>Tables:</b>       | <b>S3-S5</b> |

## **EXPERIMENTAL**

### **The process of cooking with active oxygen and solid alkali (CAOSA) to treat WP or BR**

A pre-processing and post-processing sketch of CAOSA showed as Figure S1b. The raw materials WP and BR were milled to the size of 10 - 20 mesh and cooked in ball-shaped digester (independently designed by our group and built by Yantai Keli Chemical Equipment Company) with active oxygen and solid alkali,  $\text{Na}_2\text{CO}_3$ . 1 kg of WP or BR (dry weight) was cooked with 4 kg of water and 150 g  $\text{Na}_2\text{CO}_3$  at an initial oxygen pressure of 2.0 MPa and temperature of 160 °C for 1/2/3/5/10 h. The reaction that was allowed to continue for 10 h proceeded to near completion.

Cooling water was injected into the jacket of the reactor to quench the reaction, and the pressure was reduced through a blow-down valve. The muddy product, which was a mixture of pulp and YL, was filtered using filter cloth of 100 mesh to separate the YL and the solid pulp. The solid was further washed several times with clean water and stored as the pulp produced by the CAOSA method. The pulp is referred to as WP-CAOSA or BR-CAOSA.

## FIGURES

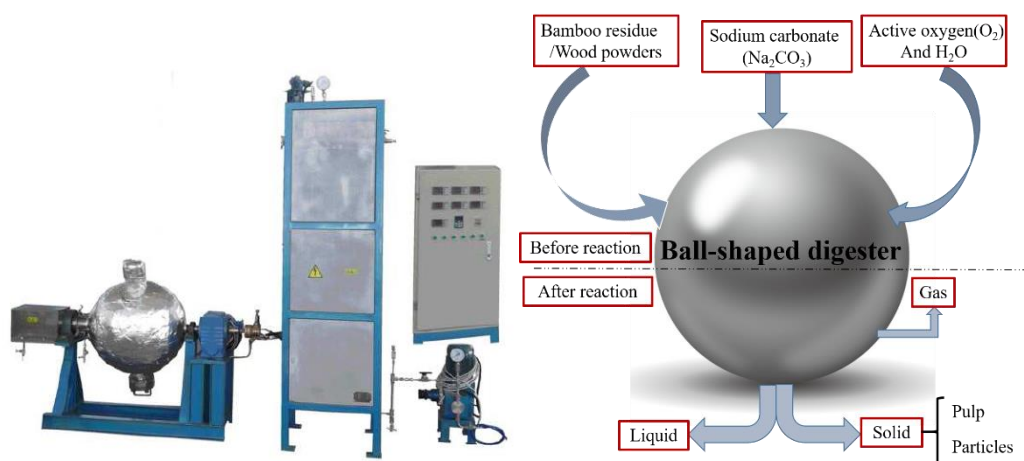

Figure S1. The image of ball-shaped digester and the process of CAOSA

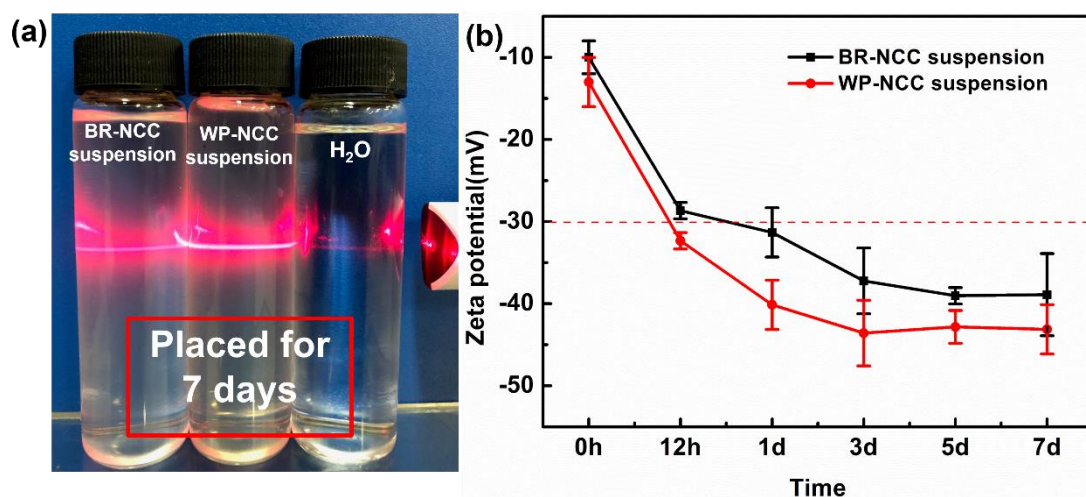

Figure S2. (a) Visual image after storage of BR-NCC and WP-NCC solution for seven days after dispersion and its Tydal phenomenon compared with H<sub>2</sub>O; (b)

Zeta-potential of BR-NCC and WP-NCC

## TABLES

Table S1 List of the fibers obtained at each stage of the NCC isolation process.

| Samples    | Condition                                                                                                 |
|------------|-----------------------------------------------------------------------------------------------------------|
| WP         | Untreated- Spruce wood powder                                                                             |
| WP-CAOSA   | CAOSA process treat WP raw material                                                                       |
| WP-CAOSA-B | CAOSA process treat WP+ Bleaching at 10%(w/w)H <sub>2</sub> O <sub>2</sub>                                |
| WP-NCC     | CAOSA process treat WP+ Bleaching at 10%(w/w)H <sub>2</sub> O <sub>2</sub> + high-pressure homogenization |
| BR         | Bamboo residue                                                                                            |
| BR-CAOSA   | CAOSA process treat BR raw material                                                                       |
| BR-CAOSA-B | CAOSA process treat BR +Bleaching at 10%(w/w)H <sub>2</sub> O <sub>2</sub>                                |
| BR-NCC     | CAOSA process treat BR +Bleaching at 10%(w/w)H <sub>2</sub> O <sub>2</sub> + high-pressure homogenization |

Table S2 Chemical compositions of the raw material and the corresponding bleached and unbleached pulps.

| Constituent    | WP[% (w/w)] |               |               | BR[% (w/w)] |               |               |
|----------------|-------------|---------------|---------------|-------------|---------------|---------------|
|                | Untreated   | WP-CAOSA Pulp | Bleached pulp | Untreated   | WP-CAOSA Pulp | Bleached pulp |
| Lignin         | 21.6        | 6.2           | 1.3           | 27.64       | 11.2          | 3.1           |
| Cellulose      | 48.5        | 81.6          | 88.4          | 50.51       | 75.6          | 84.3          |
| Hemicelluloses | 24.8        | 10.1          | 9.8           | 21.3        | 11.6          | 10.3          |
| Ash            | 0.59        | 0.50          | 0.2           | 0.4         | 0.36          | 0.2           |

Table S3 Infrared transmittance peaks (cm<sup>-1</sup>) of the fibres in different stages.

| Samples    | -OH stretching | C-H vibration | Absorbed water | C-H stretching | Aromatic ring vibration of lignin | C-C stretching |
|------------|----------------|---------------|----------------|----------------|-----------------------------------|----------------|
| BR         | 3468           | 2923          | 1637           | 1386           | 1250                              | 1120           |
| BR-CAOSA   | 3405           | 2900          | 1596           | 1375           | 1242                              | 1112           |
| BR-CAOSA-B | 3465           | 2940          | 1636           | 1382           | -                                 | 1112           |
| WP         | 3450           | 2921          | 1637           | 1390           | 1256                              | 1121           |
| WP-CAOSA   | 3242           | 2902          | 1597           | 1375           | 1220                              | 1124           |
| WP-CAOSA-B | 3412           | 2900          | 1636           | 1374           | -                                 | 1131           |

Table S4 Thermal properties of WP and BR fibers after various stages of treatment

| Samples    | T <sub>on</sub> (°C) | T <sub>max</sub> (°C) | Residue at 600 °C (%) |
|------------|----------------------|-----------------------|-----------------------|
| WP         | 302.34               | 348.78                | 29.05                 |
| WP-CAOSA   | 243.42               | 297.23                | 32.58                 |
| WP-CAOSA-B | 306.98               | 345.27                | 19.40                 |
| WP-NCC     | 280.72               | 328.12                | 18.58                 |
| BR         | 294.62               | 352.09                | 30.10                 |
| BR-CAOSA   | 238.51               | 288.95                | 32.55                 |
| BR-CAOSA-B | 314.35               | 345.45                | 25.25                 |
| BR-NCC     | 300.95               | 343.87                | 22.74                 |

Table S5 Nanocellulose concentration with varying time of placement

| Time          | 0h     | 12h     | 1day    | 3days   | 5days   | 7days   |
|---------------|--------|---------|---------|---------|---------|---------|
| Concentration | 1.0wt% | 0.86wt% | 0.69wt% | 0.62wt% | 0.63wt% | 0.60wt% |

Table S6. Effect of reaction time on the properties of nanocellulose

| Condition (temperature, concentration, pressure, time) | PDI  | AS/nm |
|--------------------------------------------------------|------|-------|
| 100°C,10%,100Mpa,10min                                 | 0.44 | 264   |
| 100°C,10%,100Mpa,20min                                 | 0.35 | 262   |
| 100°C,10%,100Mpa,30min                                 | 0.29 | 232   |
| 100°C,10%,100Mpa,60min                                 | 0.28 | 210   |
